# Supplementary material for: Preclinical characterization of the Omicron XBB.1.5-adapted BNT162b2 COVID-19 vaccine
Source: PubMed Central journal article supplement (PMC11579292; doi:10.1038/s41541-024-01013-9), 2024-11-20
Supplement: 41541_2024_1013_MOESM1_ESM.pdf [file 41541_2024_1013_MOESM1_ESM.pdf]

Supplementary Materials for

**Preclinical Characterization of the BNT162b2 Omicron  
XBB.1.5-Adapted COVID-19 Vaccine**

Modjarrad et al.

**Contents**

|                                                                                                                                                                                                         |           |
|---------------------------------------------------------------------------------------------------------------------------------------------------------------------------------------------------------|-----------|
| <b>Supplementary Figure 1. SDS-PAGE of DDM-Solubilized and Purified S(P2) WT and Omicron XBB.1.5 S(P2) Proteins .....</b>                                                                               | <b>2</b>  |
| <b>Supplementary Figure 2. Glycosylation Pattern of the XBB.1.5 S(P2) Protein .....</b>                                                                                                                 | <b>3</b>  |
| <b>Supplementary Figure 3. Cryo-EM workflow for construct pSB6534 .....</b>                                                                                                                             | <b>4</b>  |
| <b>Supplementary Figure 4. Schema for BNT162b2 variant-modified vaccine mouse immunogenicity studies.....</b>                                                                                           | <b>5</b>  |
| <b>Supplementary Figure 5. Baseline pseudovirus neutralization titers (NT50) prior to BNT162b2 variant-adapted vaccine booster immunization in BNT162b2-experienced mice.....</b>                       | <b>6</b>  |
| <b>Supplementary Figure 6. Geometric mean fold rise in pseudovirus neutralization titers (NT50) from pre- to post-4th dose with a BNT162b2 variant-adapted vaccine in vaccine-experienced mice.....</b> | <b>7</b>  |
| <b>Supplementary Figure 7. Gating strategy for intracellular cytokine staining flow cytometry analysis of T cell responses .....</b>                                                                    | <b>8</b>  |
| <b>Supplementary Figure 8. SARS-CoV-2 S amino acid sequence differences across lineages and sublineages for generated pseudoviruses .....</b>                                                           | <b>9</b>  |
| <b>Supplementary Table 1. Expression Constructs of FL S(P2) and RBD proteins .....</b>                                                                                                                  | <b>10</b> |
| <b>Supplementary Table 2. Cryo-EM Data Collection, Processing and Refinement Statistics.....</b>                                                                                                        | <b>11</b> |

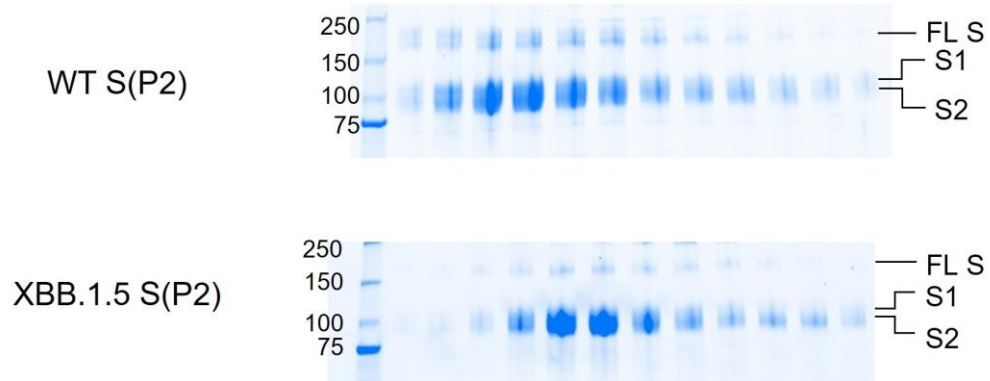

**Supplementary Figure 1. SDS-PAGE of DDM-Solubilized and Purified S(P2) WT and Omicron XBB.1.5 S(P2) Proteins.** SDS-PAGE of the SEC fractions from 11.5 mL to 15 mL of the WT S(P2) (upper panel) and 11 mL to 14.5 mL of FL Omicron XBB.1.5 S(P2) (lower panel).

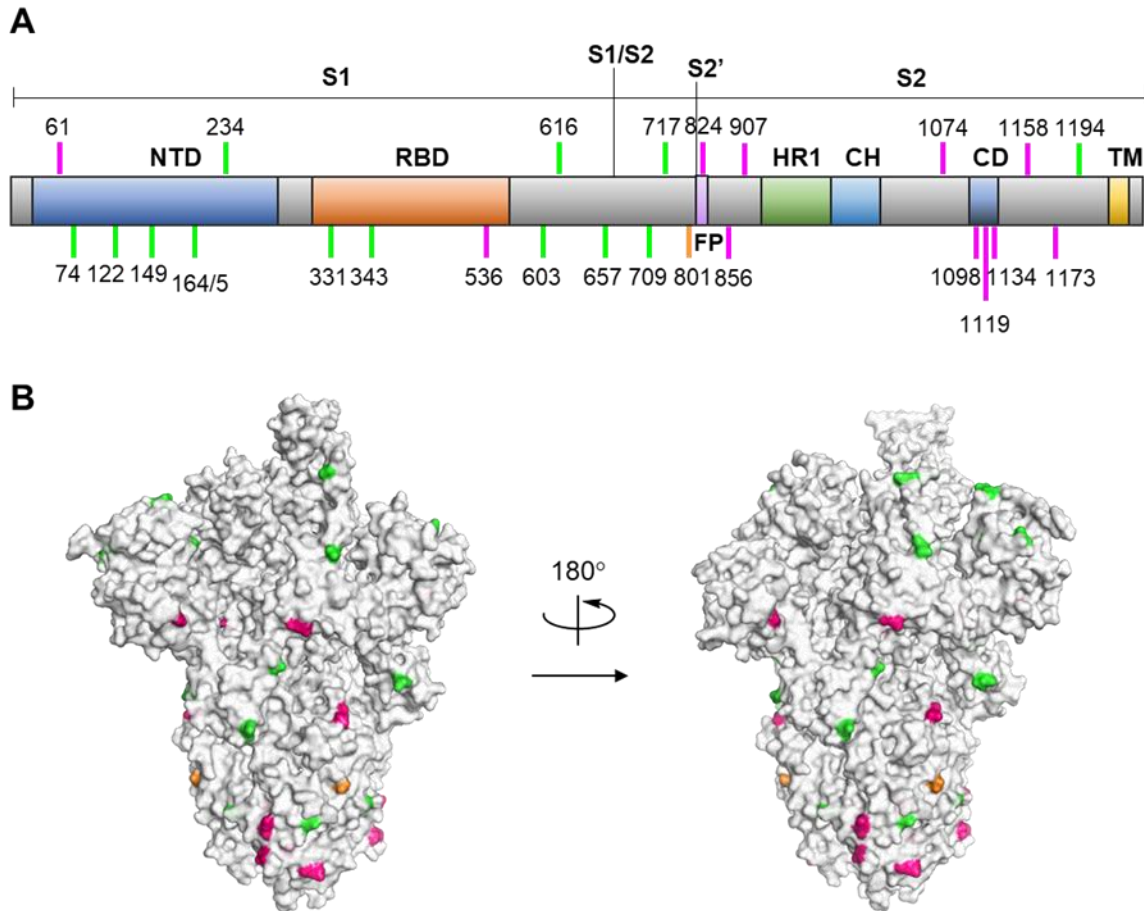

**Supplementary Figure 2. Glycosylation Pattern of the XBB.1.5 S(P2) Protein. A.** Schematic representation of the Omicron XBB.1.5 S glycoprotein. The positions of N-linked glycosylation observed by mass spectrometry studies are shown as bar lines. Glycan sites are colored according to glycan content: green (75 to 100%), orange (50 to 75%) and pink (0 to 50%). Protein domains are illustrated: N-terminal domain (NTD), receptor binding domain (RBD), fusion peptide (FP), heptad repeat 1 (HR1), central helix (CH), connector domain (CD), and transmembrane domain (TM). S protein S1 subunit, S2 (subunit after furin cleavage site to C-terminus) and S2' (subunit after TMPRSS2 cleavage site within the fusion peptide of Spike to C-terminus) boundaries are also illustrated. **B.** Structure-based mapping of N-linked glycans on the Omicron XBB.1.5 FL S(P2) Cryo-EM structure. Glycans are not modeled. Only glycosylated asparagine residues are highlighted and colored according to glycan content defined in **A**.

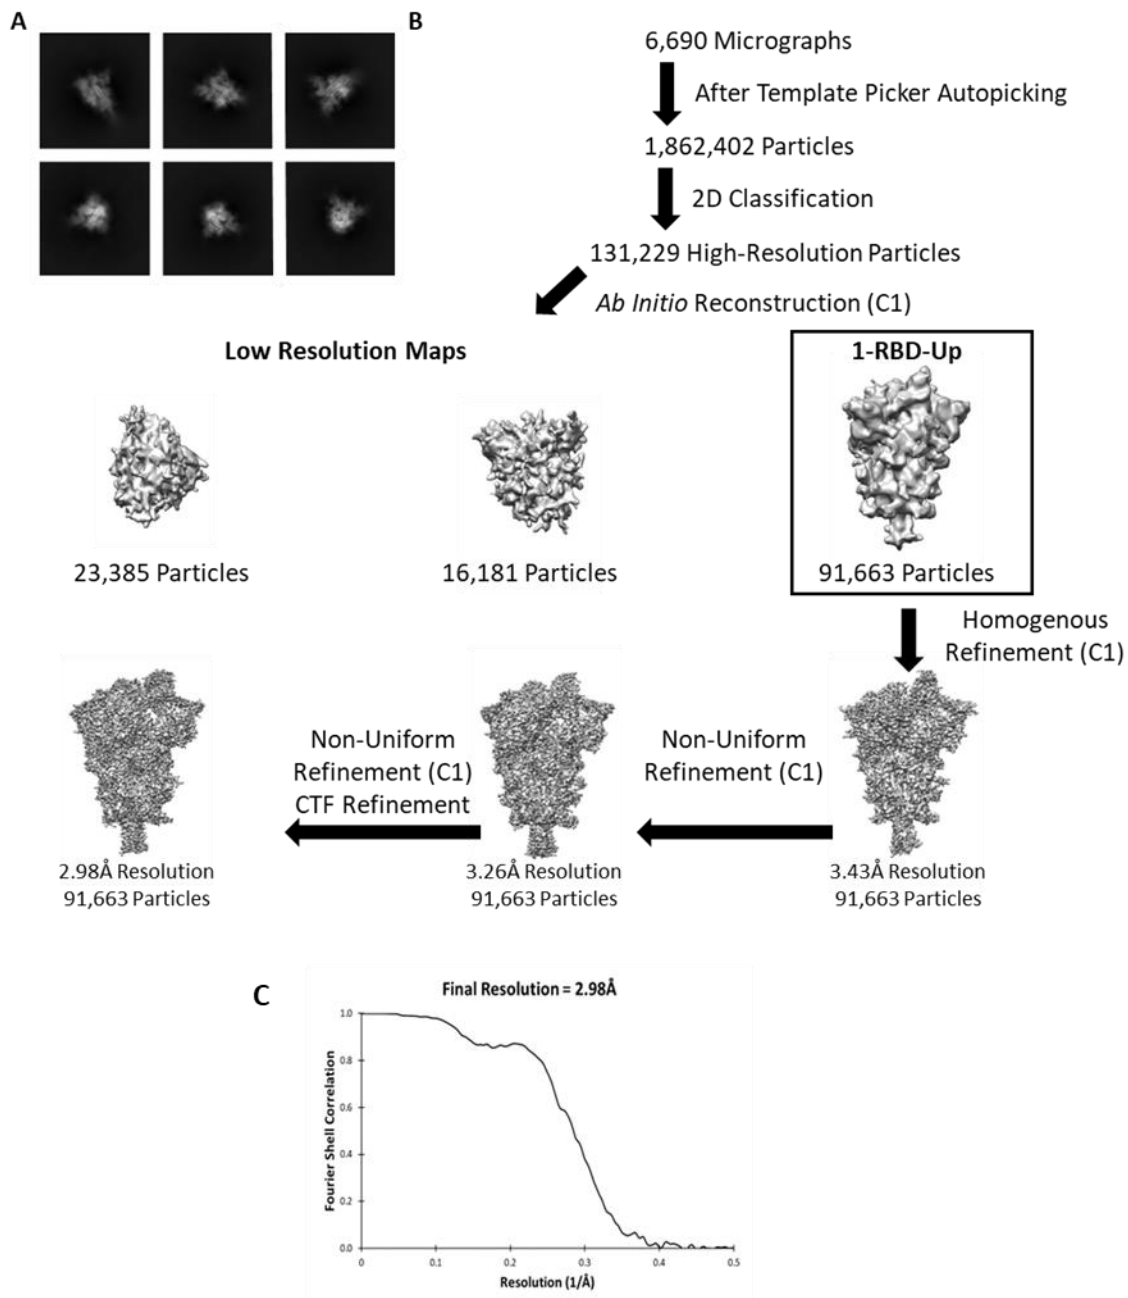

**Supplementary Figure 3. Cryo-EM workflow for construct pSB6534. A.** Representative two-dimensional class averages of Omicron XBB.1.5 FL S(P2). **B.** Cryo-EM data processing flowchart revealed 1-RBD-up as the primary S protein conformation. Particle number, Fourier shell correlation curve and corresponding resolution for the final map are indicated. **C.** Fourier shell correlation (FSC) curve indicates an overall nominal resolution of 2.98 Å using the gold standard FSC = 0.143 criterion.

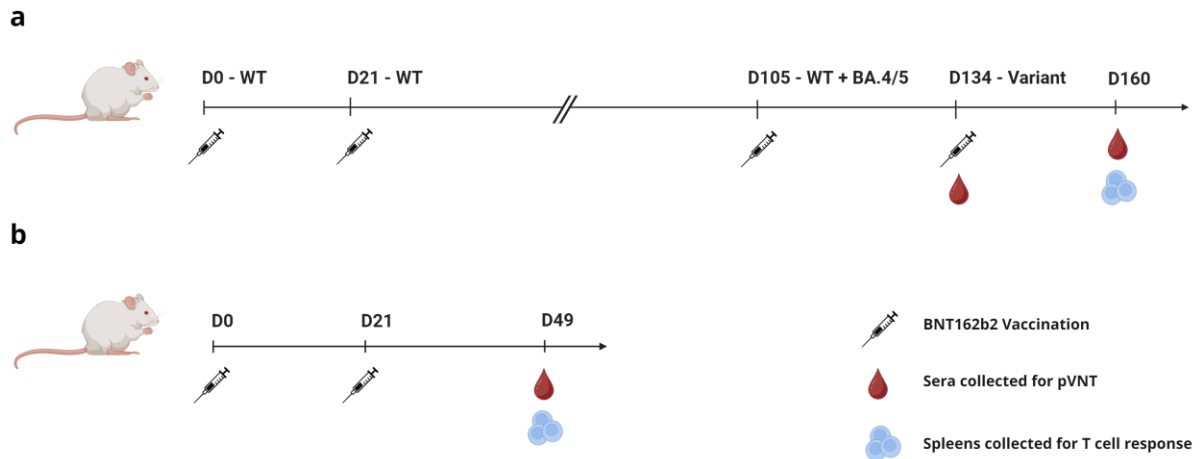

**Supplementary Figure 4. Schema for BNT162b2 variant-modified vaccine mouse immunogenicity studies.** **A.** In the booster study, female BALB/c mice were administered a two-dose series of the original monovalent BNT162b2 (WT) vaccine (Day 0, 21), followed by a third dose with the bivalent WT + BA.4/5 BNT162b2 vaccine (Day 105), and a 4th dose (Day 134) with one of the following variant-modified BNT162b2 vaccines: monovalent Omicron BA.4/5, bivalent WT + Omicron BA.4/5, monovalent Omicron XBB.1.5 or bivalent Omicron XBB.1.5 + Omicron BA.4/5. Sera for pseudovirus neutralization test (pVNT) were collected just prior to the final vaccination (Day 134) and the last post-vaccination timepoint (Day 160). **B.** In the primary series study, female BALB/c mice (10 per group) were administered a two-dose series (Day 0, 21) of one of the following variant-modified BNT162b2 vaccines: monovalent Omicron BA.4/5, bivalent WT + Omicron BA.4/5, monovalent Omicron XBB.1.5 or bivalent Omicron XBB.1.5 + Omicron BA.4/5. Sera for the pVNT were collected at 2 weeks after the second vaccination (Day 49). In both **A** and **B**, mice were vaccinated in groups of 10, spleens were collected at the final post-vaccination timepoints, and the total dose level for each vaccine formulation administered was 0.5  $\mu$ g. Created in BioRender. D'Arco, C. (2024) BioRender.com/v29f815

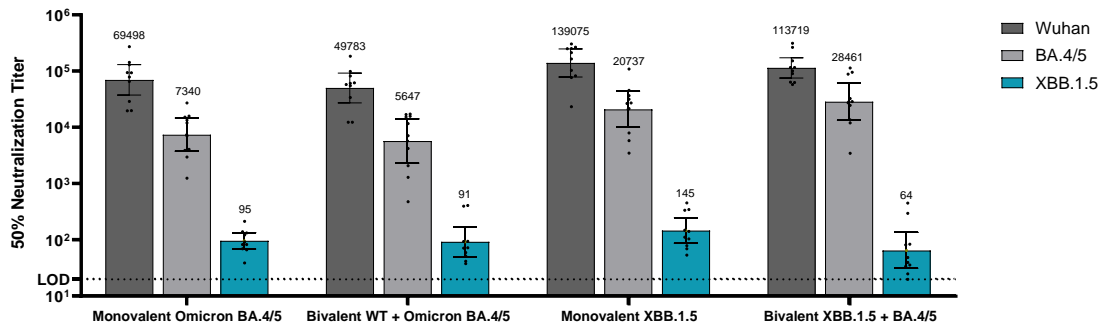

**Supplementary Figure 5. Baseline pseudovirus neutralization titers (NT50) prior to BNT162b2 variant-adapted vaccine booster immunization in BNT162b2-experienced mice.** Female BALB/c mice (10/group) previously vaccinated with two doses of monovalent original BNT162b2, and one subsequent dose of bivalent BNT162b2 (WT + Omicron BA.4/5) received a single intramuscular dose of one of the following variant modified BNT162b2 vaccines: monovalent Omicron BA.4/5, bivalent WT + Omicron BA.4/5, monovalent Omicron XBB.1.5 or bivalent Omicron XBB.1.5 + Omicron BA.4/5. All vaccine formulations contained a total dose of 0.5  $\mu$ g. Serum neutralizing antibody responses were assessed in a pseudovirus neutralization assay for the pre-fourth dose timepoint against the Wuhan reference strain, and the Omicron sublineages BA.4/5 and XBB.1.5. 50% pseudovirus neutralization titers are shown as geometric mean titers (GMT) with 95% CI of 10 mice per vaccine group. The limit of detection (LOD) is the lowest serum dilution, 1:20. Each point represents an individual animal.

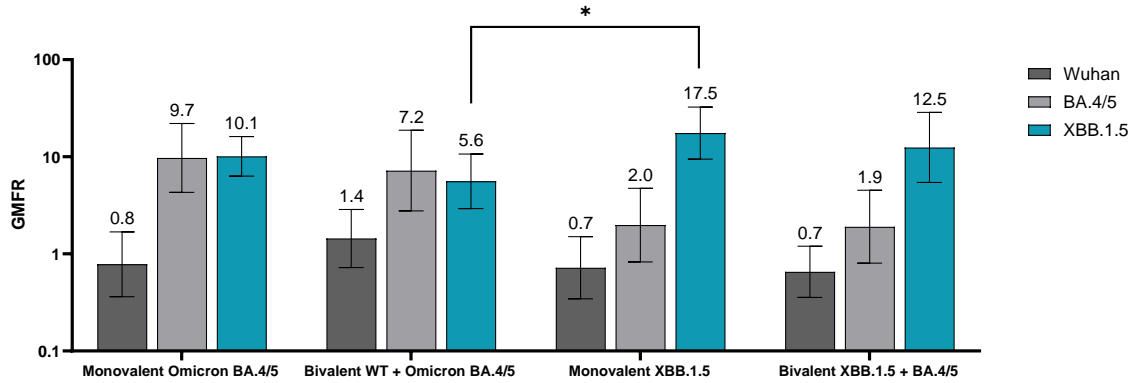

**Supplementary Figure 6. Geometric mean fold rise in pseudovirus neutralization titers (NT50) from pre- to post-4th dose with a BNT162b2 variant-adapted vaccine in vaccine-experienced mice.** Female BALB/c mice (10/group) that were previously vaccinated with two-doses of original monovalent BNT162b2 (WT) vaccine, and one subsequent dose of bivalent WT + Omicron BA.4/5 vaccine received a single intramuscular booster dose of one of the following variant-modified BNT162b2 vaccines: monovalent Omicron BA.4/5, bivalent WT + Omicron BA.4/5, monovalent Omicron XBB.1.5 or bivalent Omicron XBB.1.5 + Omicron BA.4/5. All vaccine formulations contained a total dose of 0.5 µg. Serum neutralizing antibody responses were measured by a pseudovirus neutralization assay. The fold rise in geometric mean neutralizing titers (GMFR) from pre-fourth dose to one-month post-dose are shown with 95% CI for the Wuhan reference strain, Omicron BA.4/5 and XBB.1.5. The limit of detection (LOD) is the lowest serum dilution, 1:20. Statistical differences between vaccine groups were analysed by ANOVA (\*p<0.05).

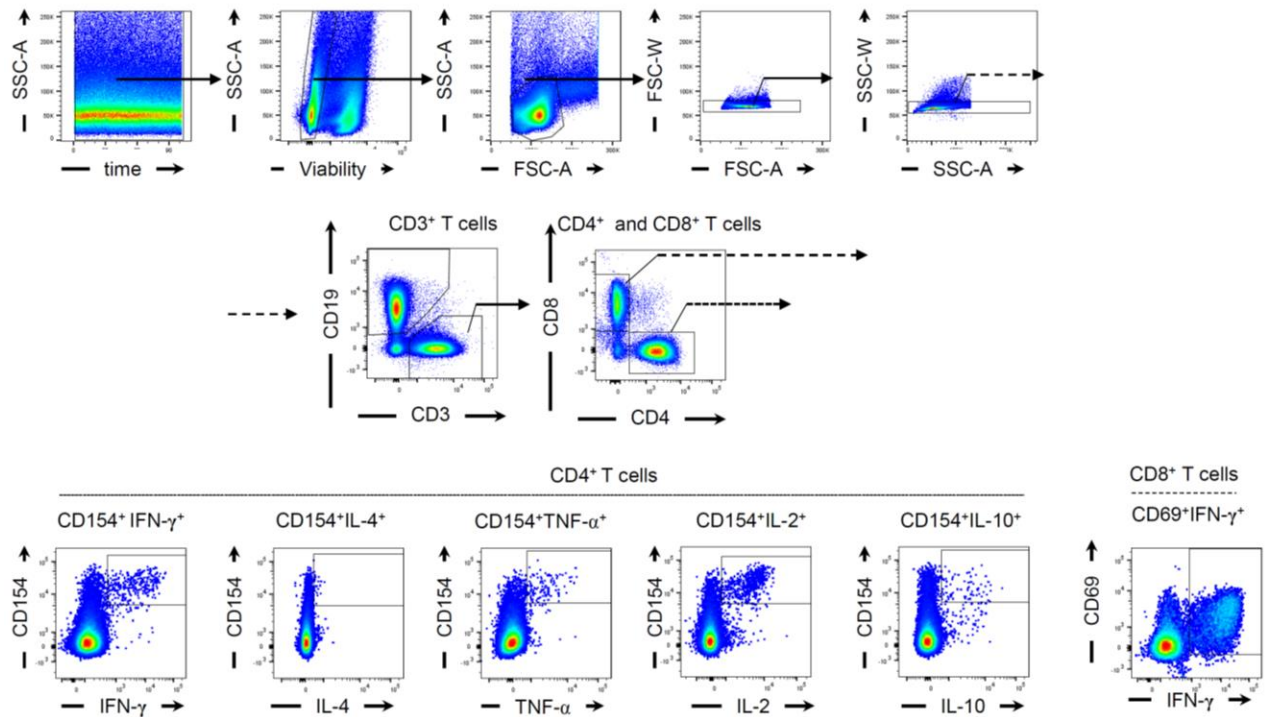

**Supplementary Figure 7. Gating strategy for intracellular cytokine staining flow cytometry analysis of T cell responses.** Flow cytometry gating strategy for identification of SARS-CoV-2 spike-specific T cells for different sublineages. (Upper row, left to right) Starting with events acquired with a constant flow stream and fluorescence intensity, viable cells, lymphocytes, and single events were identified and gated. Within singlet lymphocytes, CD19-negative CD3<sup>+</sup> T cells were identified and gated into CD4<sup>+</sup> and CD8<sup>+</sup> T cells (middle row). Antigen-specific CD4<sup>+</sup> T cells were identified by gating on CD154 and cytokine-positive cells. Activated CD8<sup>+</sup> T cells were identified by gating on CD69 and cytokine-positive cells (bottom row). The antigen-specific cell frequencies were used for further analysis.



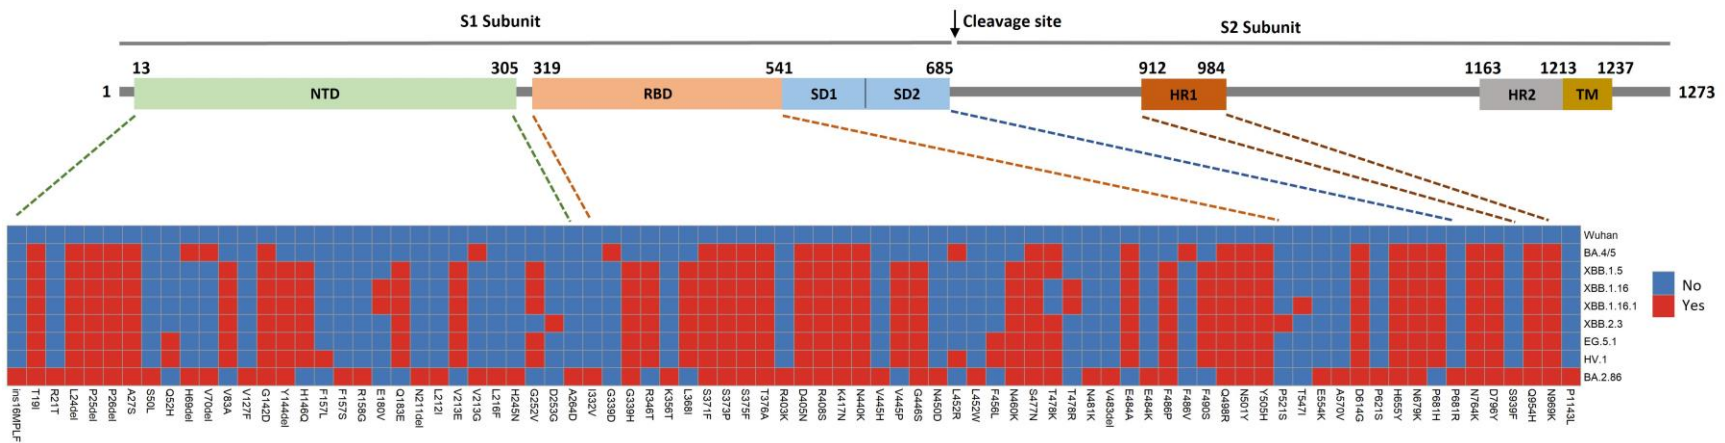

**Supplementary Figure 8. SARS-CoV-2 S amino acid sequence differences across lineages and sublineages for generated pseudoviruses.** Isolates metadata for each lineage was downloaded from GISAID (<https://gisaid.org/>) by filtering lineage name. Frequency of spike (S) protein amino acid difference relative to the ancestral strain within each lineage was calculated and a consensus S protein amino acid sequence list was generated by prioritizing sequence differences observed across more than 50% of sequences in the GISAID database. Consensus S protein amino acid sequence lists for all lineages were then aligned and plotted using R library heatmap. NTD – N-terminal domain; RBD-receptor binding domain; SD-subdomain 1; SD2-subdomain 2; HR1-heptad repeat 1; HR2-heptad repeat 2; TM-transmembrane domain.

**Supplementary Table 1. Expression Constructs of FL S(P2) and RBD proteins**

| <b>Code</b> | <b>Description</b>      | <b>Mutations</b>                                                                                                                                                                                                                                                                                                     | <b>Affinity Tag</b>  |
|-------------|-------------------------|----------------------------------------------------------------------------------------------------------------------------------------------------------------------------------------------------------------------------------------------------------------------------------------------------------------------|----------------------|
| pSB2782     | S(P2) (WT )             | K986P, V987P                                                                                                                                                                                                                                                                                                         | C-terminal TwinStrep |
| pSB6534     | S(P2) (Omicron XBB.1.5) | K986P, V987P, T19I, L24del, P25del, P26del, A27S, V83A, G142D, Y144del, H146Q, Q183E, V213E, G252V, G339H, R346T, L368I, S371F, S373P, S375F, T376A, D405N, R408S, K417N, N440K, V445P, G446S, N460K, S477N, T478K, E484A, F486P, F490S, Q498R, N501Y, Y505H, D614G, H655Y, N679K, P681H, N764K, D796Y, Q954H, N969K | C-terminal TwinStrep |
| pSB2661     | RBD (WT )               |                                                                                                                                                                                                                                                                                                                      | C-terminal StrepII   |
| pSB6876     | RBD (Omicron XBB.1.5)   | G339H, R346T, L368I, S371F, S373P, S375F, T376A, D405N, R408S, K417N, N440K, V445P, G446S, N460K, S477N, T478K, E484A, F486P, F490S, Q498R, N501Y, Y505H                                                                                                                                                             | C-terminal His'8     |

**Supplementary Table 2. Cryo-EM Data Collection, Processing and Refinement Statistics**

| <b>Data Collection and Processing</b>                     | Omicron XBB.1.5 FL S(P2) |
|-----------------------------------------------------------|--------------------------|
| Magnification                                             | 130,000x                 |
| Voltage (kV)                                              | 300                      |
| Total Electron Exposure (e <sup>-</sup> /Å <sup>2</sup> ) | 40.0                     |
| Defocus Range (µm)                                        | -0.6 to -2.8             |
| Pixel Size (Å) - Counting Mode                            | 0.750                    |
| Movies Recorded                                           | 6,690                    |
| Symmetry Imposed                                          | C1                       |
| Initial Particle Images (no)                              | 1,862,402                |
| Final Particle Images (no)                                | 91,633                   |
| Map Resolution at FSC=0.143 (Å)                           | 2.98                     |
| <b>Refinement</b>                                         |                          |
| Map sharpening <i>B</i> factor (Å <sup>2</sup> )          | -55.8                    |
| Model composition in the asymmetric unit                  |                          |
| Non-hydrogen atoms                                        | 21,179                   |
| Protein residues                                          | 2,758                    |
| B factors (Å <sup>2</sup> )                               |                          |
| Protein                                                   | 35.997                   |
| R.M.S. Deviations                                         |                          |
| Bond lengths (Å)                                          | 0.004                    |
| Bond angles (°)                                           | 0.734                    |
| Validation                                                |                          |
| MolProbity score                                          | 1.78                     |
| Clashscore                                                | 3.04                     |
| Poor rotamer (%)                                          | 2.71                     |
| Ramachandran Plot                                         |                          |
| Favored (%)                                               | 94.83                    |
| Allowed (%)                                               | 5.17                     |
| Outliers (%)                                              | 0.00                     |
